# Supplementary material
Source: PubMed Central journal article supplement (PMC3188835)
Supplement: mmc1.pdf [file mmc1.pdf]

The American Journal of Human Genetics, Volume 89  
Supplemental Data

**Mutations in Iron-Sulfur Cluster Scaffold Genes *NFU1*  
and *BOLA3* Cause a Fatal Deficiency Of Multiple  
Respiratory Chain and 2-Oxoacid Dehydrogenase Enzymes**

Jessie M. Cameron, Alexandre Janer, Valeriy Levandovskiy, Nevena MacKay, Isla Ogilvie, Eric A. Shoubridge, and Brian H. Robinson

Table S1. Oligonucleotide Primers Using for PCR Amplification and Sequencing

|                                | <b>Forward Primer</b>                  | <b>Reverse Primer</b>                           | <b>Product Size</b>                                                                     |
|--------------------------------|----------------------------------------|-------------------------------------------------|-----------------------------------------------------------------------------------------|
| <i>NFUI</i><br>cDNA            | 5'-CGC AGA TCT TTC<br>GTG GTT CT-3'    | 5'-AAT CTT CAA GTT<br>CCT CAG CAT ATT-3'        | 999bp product from<br>cytosolic isoform,<br>909bp product from<br>mitochondrial isoform |
| <i>BOLA3</i><br>cDNA           | 5'-TTT CGG GCA TAC<br>AGT GAC CT-3'    | 5'-GTT GTT TGT TTC<br>CTT TAA TTA ACA<br>TCT-3' | 544bp product for<br>isoform 1, 455bp<br>product for isoform 2                          |
| <i>NFUI</i> exon<br>6 gDNA     | 5'-TTC TGT CAT CAA<br>TTT CCC AAA A-3' | 5'-TCA ATT GTC ACG<br>GCT ACC TG-3'             | 376bp product                                                                           |
| <i>BOLA3</i><br>exon 2<br>gDNA | 5'-CAC AGT GGC CCA<br>GCT CAG-3'       | 5'-GTC CTT CCA AAG<br>GGC AAA AT-3'             | 242bp product from<br>both isoforms                                                     |
